# Supplementary material for: Psychosocial determinants of sustained maternal functional impairment: Longitudinal findings from a pregnancy-birth cohort study in rural Pakistan
Source: PLoS One. 2019 Nov 19;14(11):e0225163. doi: 10.1371/journal.pone.0225163 (PMC6863521; doi:10.1371/journal.pone.0225163)
Supplement: S1 Table — (DOCX) [file pone.0225163.s001.docx]

**S1 Table. Baseline demographics by inclusion and exclusion**

| |  | 3 or more data points available | 2 or fewer data points available | | --- | --- | --- | |  | (N = 960) | (N = 194) | |
| --- | --- | --- | --- | --- | --- | --- |
| | **Maternal Age (years)** |  |  | | --- | --- | --- | | Mean (SD) | 26.70 (4.48) | 26.76 (4.86) | | Median (Q1, Q3) | 26.0 (24.0, 30.0) | 27.0 (23.0, 30.0) | | % Missing (Min, Max) | 0.0% (18.0, 45.0) | 0.0% (18.0, 41.0) | | **SES Asset Index Score** |  |  | | Mean (SD) | 0.03 (1.61) | -0.17 (1.70) | | Median (Q1, Q3) | 0.4 (-0.9, 1.2) | 0.1 (-1.2, 1.1) | | % Missing (Min, Max) | 0.0% (-5.0, 2.8) | 0.0% (-4.5, 2.5) | | **Maternal Education (years)** |  |  | | None (0) | 135 (14.1%) | 35 (18.0%) | | Primary (1-5) | 191 (19.9%) | 35 (18.0%) | | Middle (6-8) | 180 (18.8%) | 35 (18.0%) | | Secondary (9-10) | 245 (25.5%) | 48 (24.7%) | | Higher Secondary (11-12) | 94 (9.8%) | 15 (7.7%) | | Tertiary (>12) | 115 (12.0%) | 26 (13.4%) | | **Number of living children** |  |  | | First pregnancy | 280 (29.2%) | 69 (35.6%) | | 1 to 3 | 596 (62.1%) | 103 (53.1%) | | 4 | 84 (8.8%) | 22 (11.3%) | | **Household structure** |  |  | | Nuclear | 208 (21.7%) | 52 (26.8%) | | Joint/extended | 636 (66.3%) | 123 (63.4%) | | Multiple households | 116 (12.1%) | 19 (9.8%) | | **Long standing illness, disability or infirmity?** |  |  | | No | 821 (85.5%) | 170 (87.6%) | | Yes | 139 (14.5%) | 24 (12.4%) | |

SES: Socioeconomic Status
