# Supplementary material for: Psychosocial determinants of sustained maternal functional impairment: Longitudinal findings from a pregnancy-birth cohort study in rural Pakistan
Source: PLoS One. 2019 Nov 19;14(11):e0225163. doi: 10.1371/journal.pone.0225163 (PMC6863521; doi:10.1371/journal.pone.0225163)
Supplement: S2 Table — (DOCX) [file pone.0225163.s002.docx]

**S2 Table. Baseline demographics by all time points available versus three time points**

| |  | All four data points available | 3 data points available | | --- | --- | --- | |  | (N = 783) | (N = 177) | |
| --- | --- | --- | --- | --- | --- | --- |
| | **Age (in years).** |  |  | | --- | --- | --- | | Mean (SD) | 26.65 (4.36) | 26.89 (4.97) | | Median (Q1, Q3) | 26.0 (24.0, 30.0) | 27.0 (24.0, 30.0) | | % Missing (Min, Max) | 0.0% (18.0, 40.0) | 0.0% (18.0, 45.0) | | **SES Asset Index Score** |  |  | | Mean (SD) | 0.05 (1.60) | -0.06 (1.67) | | Median (Q1, Q3) | 0.4 (-0.8, 1.2) | 0.3 (-1.1, 1.1) | | % Missing (Min, Max) | 0.0% (-5.0, 2.8) | 0.0% (-4.7, 2.8) | | **Maternal Education (years)** |  |  | | None (0) | 107 (13.7%) | 28 (15.8%) | | Primary (1-5) | 151 (19.3%) | 40 (22.6%) | | Middle (6-8) | 150 (19.2%) | 30 (16.9%) | | Secondary or more (6-12+) | 375 (47.9%) | 30 (16.9%) | | **How many living children do you have?** |  |  | | First pregnancy | 224 (28.6%) | 56 (31.6%) | | 1 to 3 | 494 (63.1%) | 102 (57.6%) | | 4 | 65 (8.3%) | 19 (10.7%) | | **Household structure** |  |  | | Nuclear | 171 (21.8%) | 37 (20.9%) | | Joint/Multiple households | 612 (78.2%) | 140 (79.1%) | | **Long standing illness, disability or infirmity?** |  |  | | No | 663 (84.7%) | 156 (88.1%) | | Yes | 120 (15.4%) | 21 (11.9%) | |

SES: Socioeconomic Status
